# Supplementary material for: A flexible polyaniline-based bioelectronic patch
Source: Royal Society of Chemistry journal article supplement (doi:10.1039/c7bm00880e), 2018-01-01
Supplement: c7bm00880e1.pdf [file c7bm00880e1.pdf]

## Electronic Supplementary Information (ESI) for

### A flexible polyaniline-based bioelectronic patch

Chen Cui,<sup>a</sup> Nastaran Faraji,<sup>a</sup> Antonio Lauto,<sup>b</sup> Lorenzo Travaglini,<sup>a</sup> Joanne Tonkin,<sup>c</sup> David Mahns,<sup>b</sup> Eleanor Humphrey,<sup>c</sup> Cesare Terracciano,<sup>c</sup> J. Justin Gooding,<sup>d,e</sup> Jan Seidel<sup>a</sup> and Damia Mawad<sup>a,e,f,\*</sup>

<sup>a</sup>*School of Materials Science and Engineering, UNSW Sydney, Sydney, New South Wales 2052, Australia*

<sup>b</sup>*Biomedical Engineering and Neuroscience (BENS) Research Group, University of Western Sydney, Penrith, New South Wales 2751, Australia*

<sup>c</sup>*National Heart and Lung Institute, Imperial College London, London SW7 2AZ, United Kingdom*

<sup>d</sup>*School of Chemistry, UNSW Sydney, Sydney, New South Wales 2052, Australia*

<sup>e</sup>*Australian Centre for NanoMedicine and ARC Centre of Excellence in Convergent Bio-Nano Science and Technology, UNSW Sydney, Sydney, New South Wales 2052, Australia*

<sup>f</sup>*Centre for Advanced Macromolecular Design, UNSW Sydney, Sydney, New South Wales 2052, Australia*

Corresponding author email: [damia.mawad@unsw.edu.au](mailto:damia.mawad@unsw.edu.au)

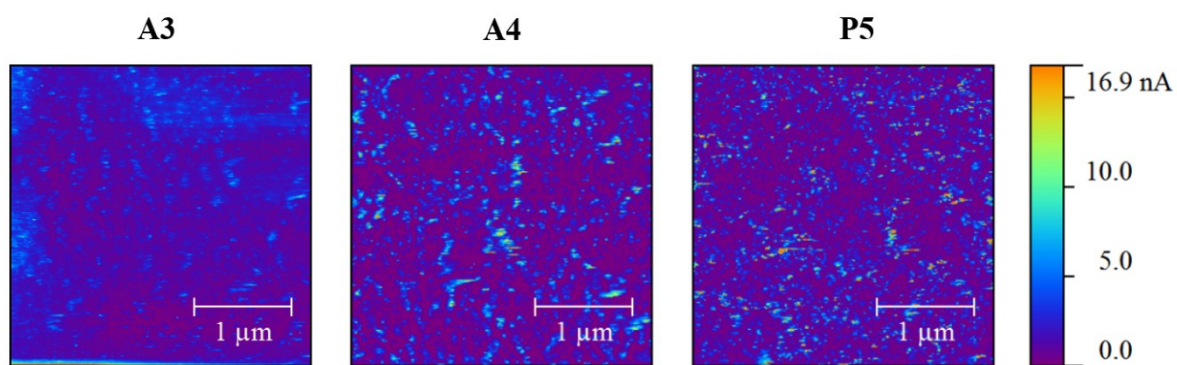

**Figure S1** Current maps of A4 and P5 patches that exhibited similar electrical properties in comparison to A3.
